# Supplementary material for: The Role of the Stem Cells Therapy in the Peripheral Artery Disease
Source: Int J Mol Sci. 2019 May 7;20(9):2233. doi: 10.3390/ijms20092233 (PMC6539394; doi:10.3390/ijms20092233)
Supplement: Supplementary file 1 [file ijms-20-02233-s001.pdf]

| Author                 | Year | Patient population                                                       | Type of stem cells                                                                                                                                | Immunophenotype                                                                 | Blinding                                                                                                                          | Results                                                                                                                                                                                                                                                           | Notes                                                                                                                                                              |
|------------------------|------|--------------------------------------------------------------------------|---------------------------------------------------------------------------------------------------------------------------------------------------|---------------------------------------------------------------------------------|-----------------------------------------------------------------------------------------------------------------------------------|-------------------------------------------------------------------------------------------------------------------------------------------------------------------------------------------------------------------------------------------------------------------|--------------------------------------------------------------------------------------------------------------------------------------------------------------------|
| Tateishi-Yuyama et al. | 2002 | CLI without surgical option                                              | Bone-marrow derived mononuclear cells (mixed population)                                                                                          | Both CD34+ and CD34- cells                                                      | Complete blinding until randomization; only principal investigators unblinded after randomization. Unspecified outcome assessment | Increase in ABI, TcO2 and pain-free walking time in the treatment group. Increase in collateral vessel formation as seen at MRA                                                                                                                                   | Marked improvement in TcPO2 and rest pain, with a majority of patients free from rest pain at 4 and 24 weeks. Showed that CD34- cells expressed angiogenic factors |
| Tateishi-Yuyama et al. | 2002 | CLI without surgical option                                              | Bone-marrow derived mononuclear cells (mixed population)                                                                                          | Both CD34+ and CD34- cells                                                      | Complete blinding until randomization; only principal investigators unblinded after randomization. Unspecified outcome assessment | Increase in ABI, TcO2 and pain-free walking time in the treatment group. Increase in collateral vessel formation as seen at MRA                                                                                                                                   | Marked improvement in TcPO2 and rest pain, with a majority of patients free from rest pain at 4 and 24 weeks. Showed that CD34- cells expressed angiogenic factors |
| Huang P et al.         | 2005 | Diabetic CLI without severe coronary, cerebral or renal vascular disease | G-CSF mobilized peripheral blood mononuclear cells                                                                                                | Mixed population                                                                | Unclear, possibly no blinding at all                                                                                              |                                                                                                                                                                                                                                                                   | Marked improvement. No blinding, no formal sample size assessment, randomization procedure unclear                                                                 |
| Lu D et al.            | 2011 | Diabetic CLI                                                             | Bone-marrow derived mononuclear cells (mixed population) in treatment group 1 and Bone-marrow derived mesenchymal stem cells in treatment group 2 | Mixed population in group 1; group 2: CD29+, CD71+, CD90+, CD105+, CD45-, CD34- | Reported double blinding, procedure of blinding not specified; single center                                                      | Both MNCs and MSCs performed better than control group. MSCs performed better than MNCs with respect to all endpoint except pain scale at rest. Ulcer healing also occurred earlier with MSCs compared to MNCs. Both treatment groups had no amputations, while 6 | Higher production of angiopoietic factors by MSC than MNC                                                                                                          |

|                      |      |                                                                   |                                                                             |                                                     |             |                                                                                                                                                                                                    |                                                                                                                                                                                                                                              |
|----------------------|------|-------------------------------------------------------------------|-----------------------------------------------------------------------------|-----------------------------------------------------|-------------|----------------------------------------------------------------------------------------------------------------------------------------------------------------------------------------------------|----------------------------------------------------------------------------------------------------------------------------------------------------------------------------------------------------------------------------------------------|
|                      |      |                                                                   |                                                                             |                                                     |             | amputations were performed in the control group                                                                                                                                                    |                                                                                                                                                                                                                                              |
| Ozturk A et al.      | 2012 | Diabetic type 2 CLI                                               | GM-CSF mobilized peripheral blood mononuclear cells                         | CD34+                                               | Unspecified | Increase in ABI, TcO2 and rest pain scale in the treatment group compared to control group. Also improved ulcer healing and amputation-free survival in treatment group compared to control group. |                                                                                                                                                                                                                                              |
| Powell RJ et al.     | 2012 | No surgical options CLI                                           | Mixed population (at least 98% of CD90+ and CD45+ cells)                    |                                                     | Reported    | Significant reduction of the composite endpoint of treatment failures in the treatment group compared to control                                                                                   | Multicenter study. Almost also 6% less new gangrene. Phase 2 study. Used as efficacy endpoint a composite of all treatment failures (time to treatment failures, including mortality, amputation, doubling of ulcers size, de novo gangrene) |
| Prochazka V et al.   | 2010 | CLI with failed surgical or endovascular options                  | Mixed population of bone marrow stem cells, no sorting or immunophenotyping | Not performed, CD34+ cells counted before injection | Unspecified | Half amputation in the treated group compared to the control group                                                                                                                                 |                                                                                                                                                                                                                                              |
| Mohammadzadeh et al. | 2013 | Diabetic CLI with failed revascularization or no surgical options | Peripheral blood mononuclear cells after G-CSF mobilization                 | Unspecified                                         | Unspecified |                                                                                                                                                                                                    |                                                                                                                                                                                                                                              |
